# Supplementary material for: Unusual slow magnetic relaxation in a mononuclear copper(ii) complex
Source: Royal Society of Chemistry journal article supplement (doi:10.1039/d2dt00023g), 2022-01-01
Supplement: d2dt00023g1.pdf [file d2dt00023g1.pdf]

Supplementary information

Unusual Slow Magnetic Relaxation in a Mononuclear Copper(II) Complex

Dušan Valigura, Cyril Rajnák,\* Ján Titiš, Ján Moncol, Alina Bieňko, Roman Boča

---

Preparation of complex  $[\text{CuLL}'_2(\text{H}_2\text{O})]$ , **1**, where  $L = 2,6\text{-dimethanolpyridine}$ ,  $L' = 3,5\text{-dinitrocarboxylate}(1-)$ , is based upon following recipe. A solution of copper(II) acetate dissolved in 20 ml of water and poured to 20 ml of aqueous solution of 2,6-pyridinedimethanol (1 mmol) and 2 mmol of 3,5-dinitrobenzoic acid was added to the reaction mixture under stirring at laboratory temperature until color stabilization and left to crystallize. The green crystals, formed within 4 weeks, were filtered, washed with small amount of water and dried in air at ambient temperature. Anal Calc for **1**: N, 10.89; C, 39.23; H, 2.66. Found: N, 10.60; C, 40.67; H, 2.92 %.

CHNS analyzer (Thermo Scientific, Flash 2000) was used for elemental analysis (EA). For FT-IR (ATR) spectra freshly grown crystals were used. The UV/Vis absorption spectra in the range 190 – 1100 nm were measured at room temperature in the Nujol suspension (Analytical Jena, Specord 250 Plus). Commercial desktop EPR spectrometer was used (ESR-5000, Margitech/Bruker) in taking the X-band powder EPR spectra at the room temperature.

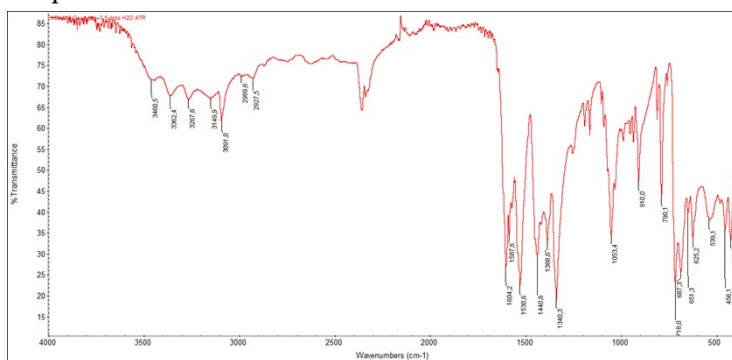

Figure S1. FT-IR spectrum of **1**.

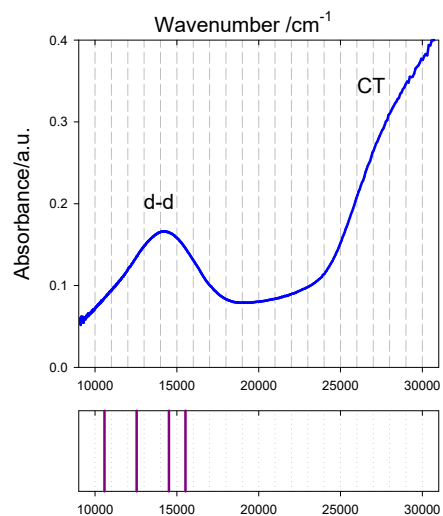

Figure S2. UV/Vis spectrum of **1**, band maximum at  $14276\text{ cm}^{-1}$ . Calculated d-d transitions – bars.

In octahedral Cu(II) complexes the ground electronic term is  ${}^2E_g$ , which is, however, a hypothetical case, since Jahn-Teller (JT) effect applies causing tetragonal and/or rhombic distortions. In the studied Cu(II) complex, SACAS[9,5]/NEVPT2 calculated first excited term lies at  $\sim 10\,508\text{ cm}^{-1}$  ( ${}^2B_{1g} \rightarrow {}^2A_{1g}$  in  $D_{4h}$ ) as a consequence of the strong JT splitting. The remaining transitions are predicted at 12544, 14517, and  $15524\text{ cm}^{-1}$ .

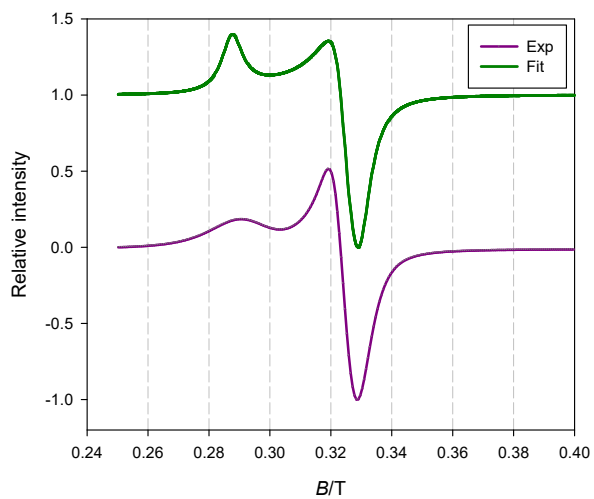

**Figure S3.** X-band (9.4457 GHz) EPR spectrum of **1** at room temperature. Simulation for a mononuclear species with  $S = 1/2$ :  $g\{2.050(1), 2.083(1), 2.347(3)\}$ .

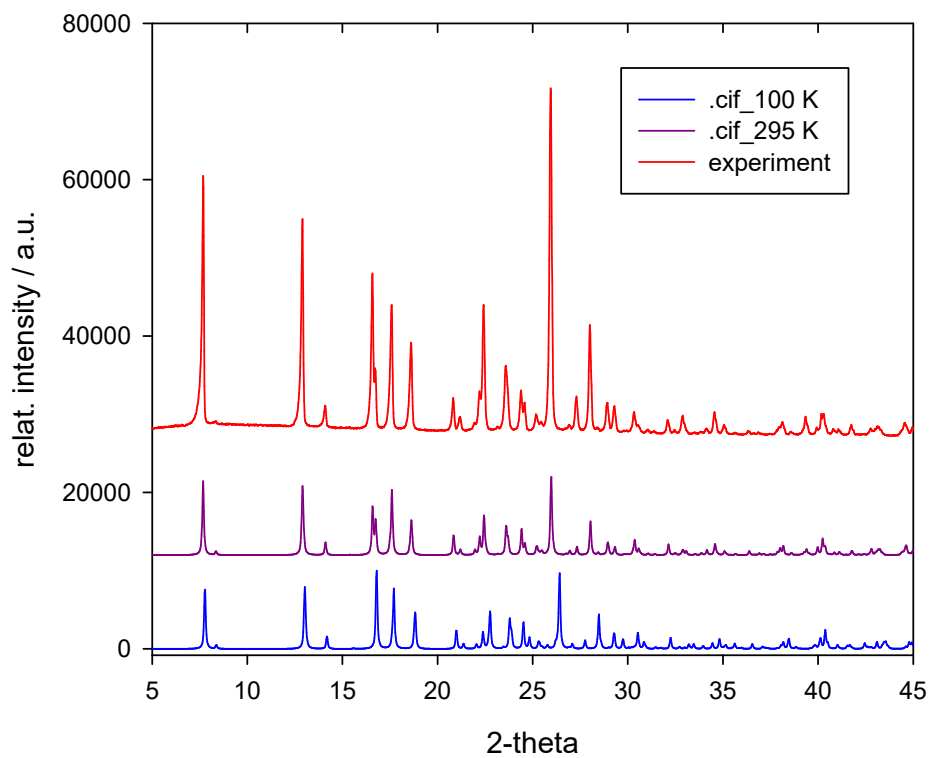

**Figure S4.** Powder diffraction patterns for **1**.

**Table S1.** Crystal data and structure refinement for **1**.

|                                       | <b>1</b>                                                         | <b>1'</b>                                                        |
|---------------------------------------|------------------------------------------------------------------|------------------------------------------------------------------|
| Empirical formula                     | C <sub>21</sub> H <sub>17</sub> CuN <sub>5</sub> O <sub>15</sub> | C <sub>21</sub> H <sub>17</sub> CuN <sub>5</sub> O <sub>15</sub> |
| Formula weight /g mol <sup>-1</sup>   | 642.93                                                           | 642.93                                                           |
| Crystal system                        | monoclinic                                                       | monoclinic                                                       |
| Space group                           | C2/c                                                             | C2/c                                                             |
| Temperature /K                        | 100                                                              | 295                                                              |
| Crystal size /mm                      | 0.26 × 0.03 × 0.02                                               | 0.56 × 0.37 × 0.18                                               |
| Z                                     | 4                                                                | 4                                                                |
| a / Å                                 | 21.1052(11)                                                      | 21.1547(4)                                                       |
| b / Å                                 | 13.4854(4)                                                       | 13.7108(3)                                                       |
| c / Å                                 | 8.4582(4)                                                        | 8.5157(1)                                                        |
| α /°                                  | 90                                                               | 90                                                               |
| β /°                                  | 90.366(4)                                                        | 90.397(1)                                                        |
| γ /°                                  | 90                                                               | 90                                                               |
| V /Å <sup>3</sup>                     | 2407.26(18)                                                      | 2469.90(8)                                                       |
| ρ <sub>calc</sub> /g cm <sup>-3</sup> | 1.774                                                            | 1.729                                                            |
| μ /mm <sup>-1</sup>                   | 2.126                                                            | 0.970                                                            |
| F(000)                                | 1208.0                                                           | 1308.0                                                           |
| Radiation                             | CuKα (λ = 1.54186)                                               | MoKα (λ = 0.71069)                                               |
| 2θ range for data collection/°        | 7.78 to 143.594                                                  | 6.498 to 59.184                                                  |
| Index ranges                          | -18 ≤ h ≤ 25, -16 ≤ k ≤ 13, -7<br>≤ l ≤ 10                       | -29 ≤ h ≤ 29, -18 ≤ k ≤ 18, -<br>11 ≤ l ≤ 11                     |
| Data/restraints/parameters            | 2319/6/196                                                       | 3303/6/197                                                       |
| Goodness-of-fit on F <sup>2</sup>     | 1.057                                                            | 1.073                                                            |
| Final R indexes [I ≥ 2σ (I)]          | R <sub>1</sub> = 0.0292, wR <sub>2</sub> = 0.0795                | R <sub>1</sub> = 0.0324, wR <sub>2</sub> = 0.0857                |
| R indices (all data)                  | R <sub>1</sub> = 0.0360, wR <sub>2</sub> = 0.0818                | R <sub>1</sub> = 0.0523, wR <sub>2</sub> = 0.0945                |
| color                                 | blue                                                             | blue                                                             |
| CCDC No.                              | 2065544                                                          | 2065545                                                          |

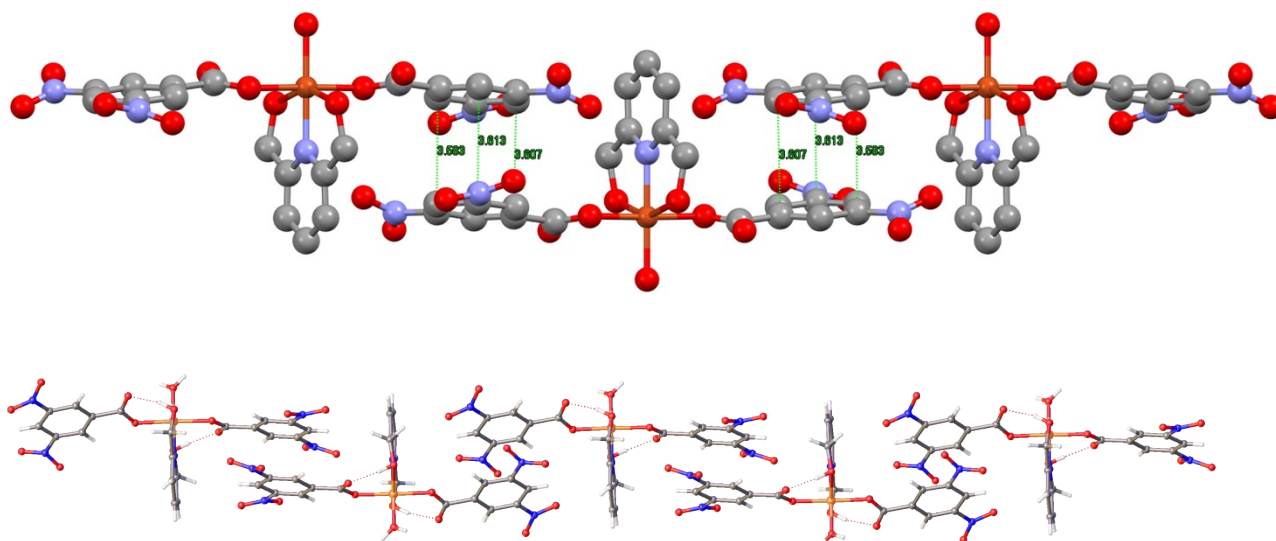

**Figure S5.** A more detailed view to the intermolecular  $\pi$ - $\pi$  stacking in **1** (top) and view of the supramolecular chain formed through  $\pi$ - $\pi$  stacking interactions [centroid-centroid distance: 3.601 Å, shift distance: 1.144 Å] (bottom).

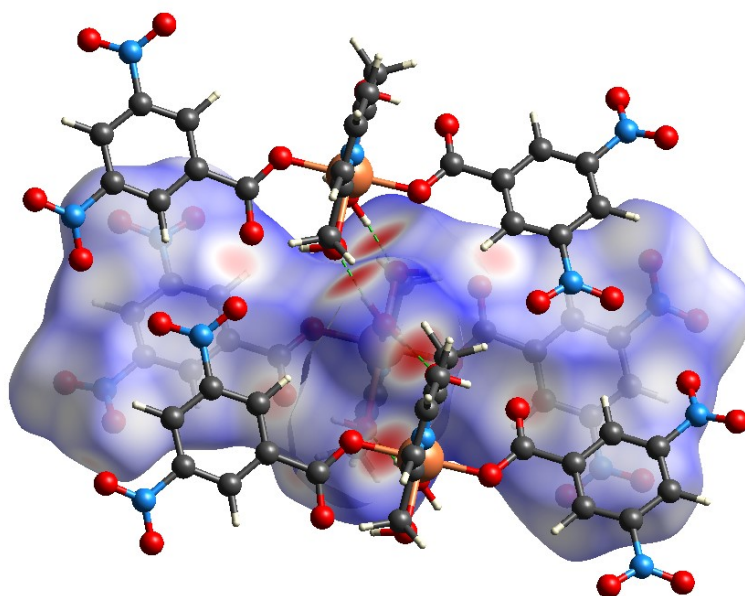

**Figure S6.** View of the three-dimensional Hirshfeld surface of **1** plotted over  $d_{\text{norm}}$  in the range -0.7248 to 1.3175 a.u. Red spots show close contacts.

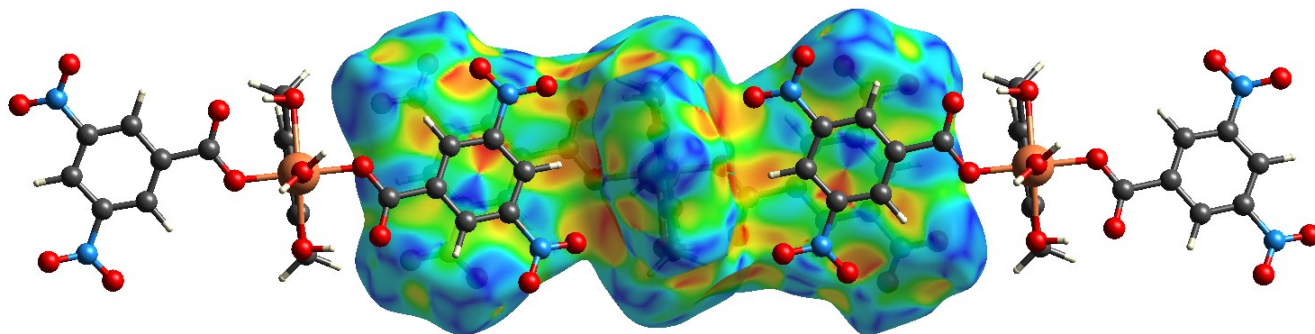

**Figure S7.** View of the three-dimensional Hirshfeld surface of **1** plotted over shape index showing  $\pi$ - $\pi$  stacking interactions.

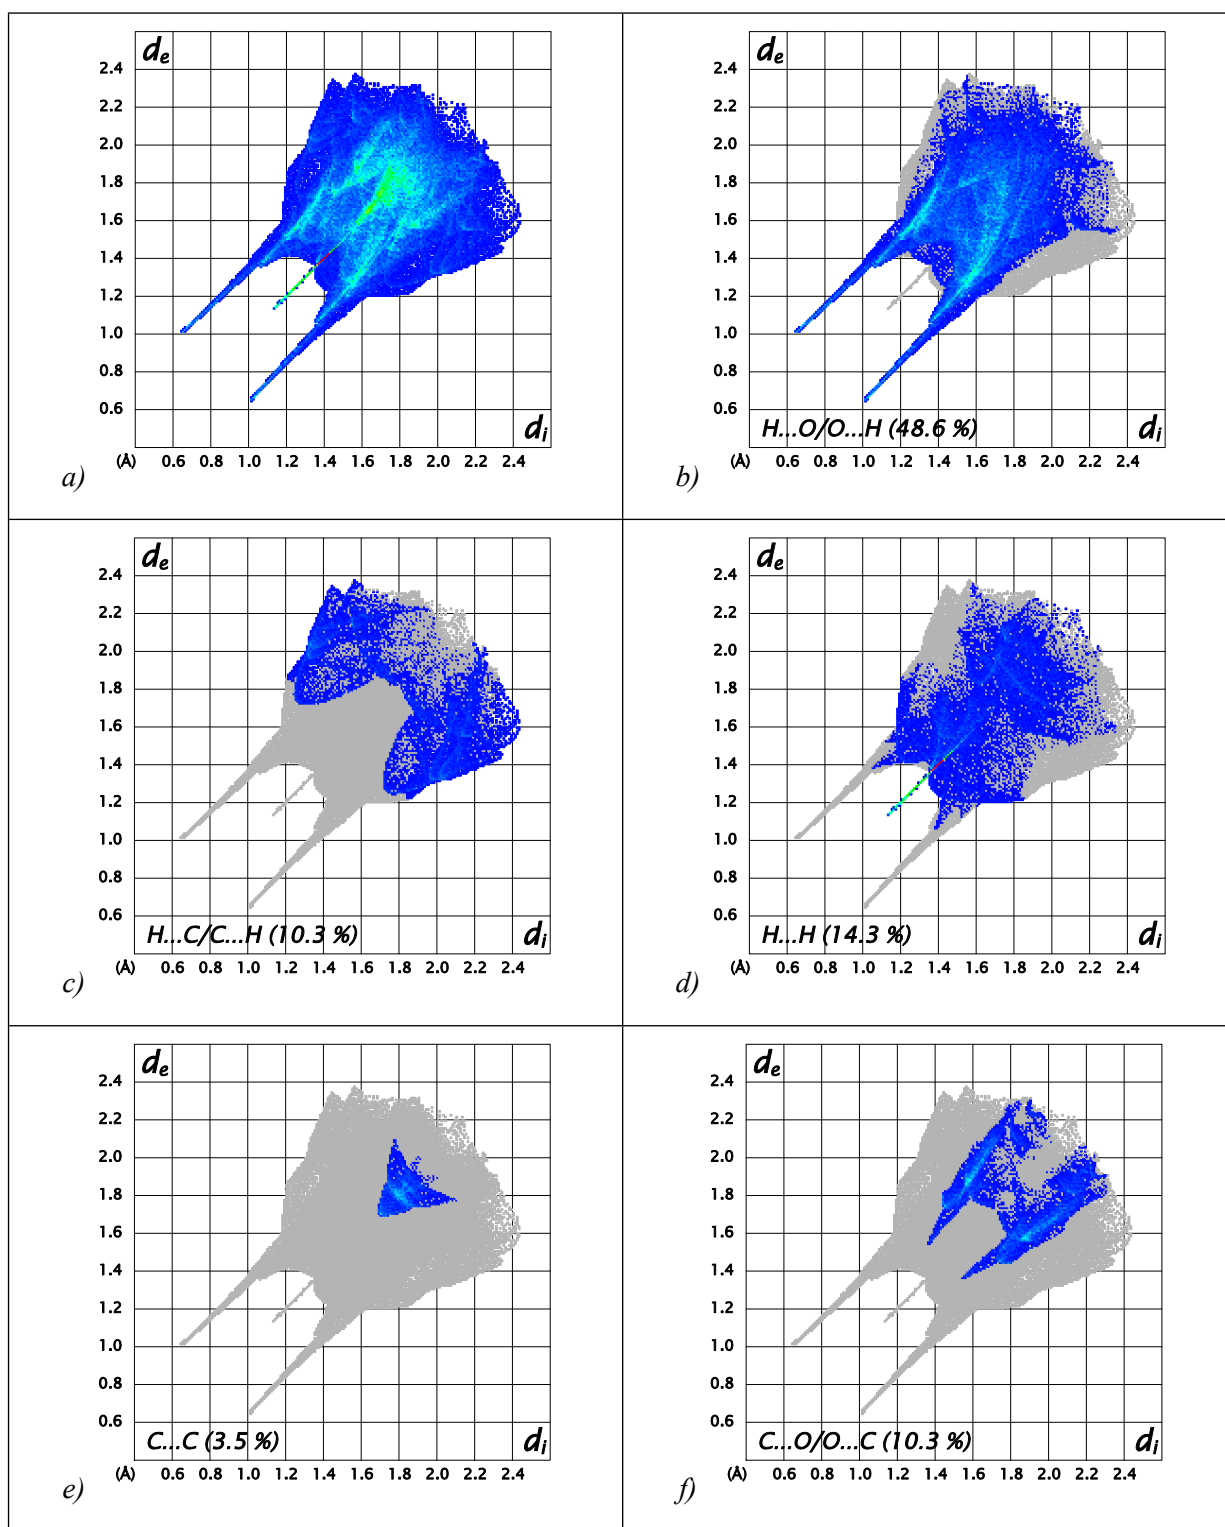

**Figure S8.** The full two-dimensional fingerprint plots of **1** (at 100K), showing (a) all interactions, and delineated into (b)  $H...O/O...H$ , (c)  $H...C/C...H$ , (d)  $H...H$ , (e)  $C...C$ , and (f)  $C...O/O...C$  interactions. The  $d_i$  and  $d_e$  values are the closest internal and external distances from given on the Hirshfeld surface contacts.

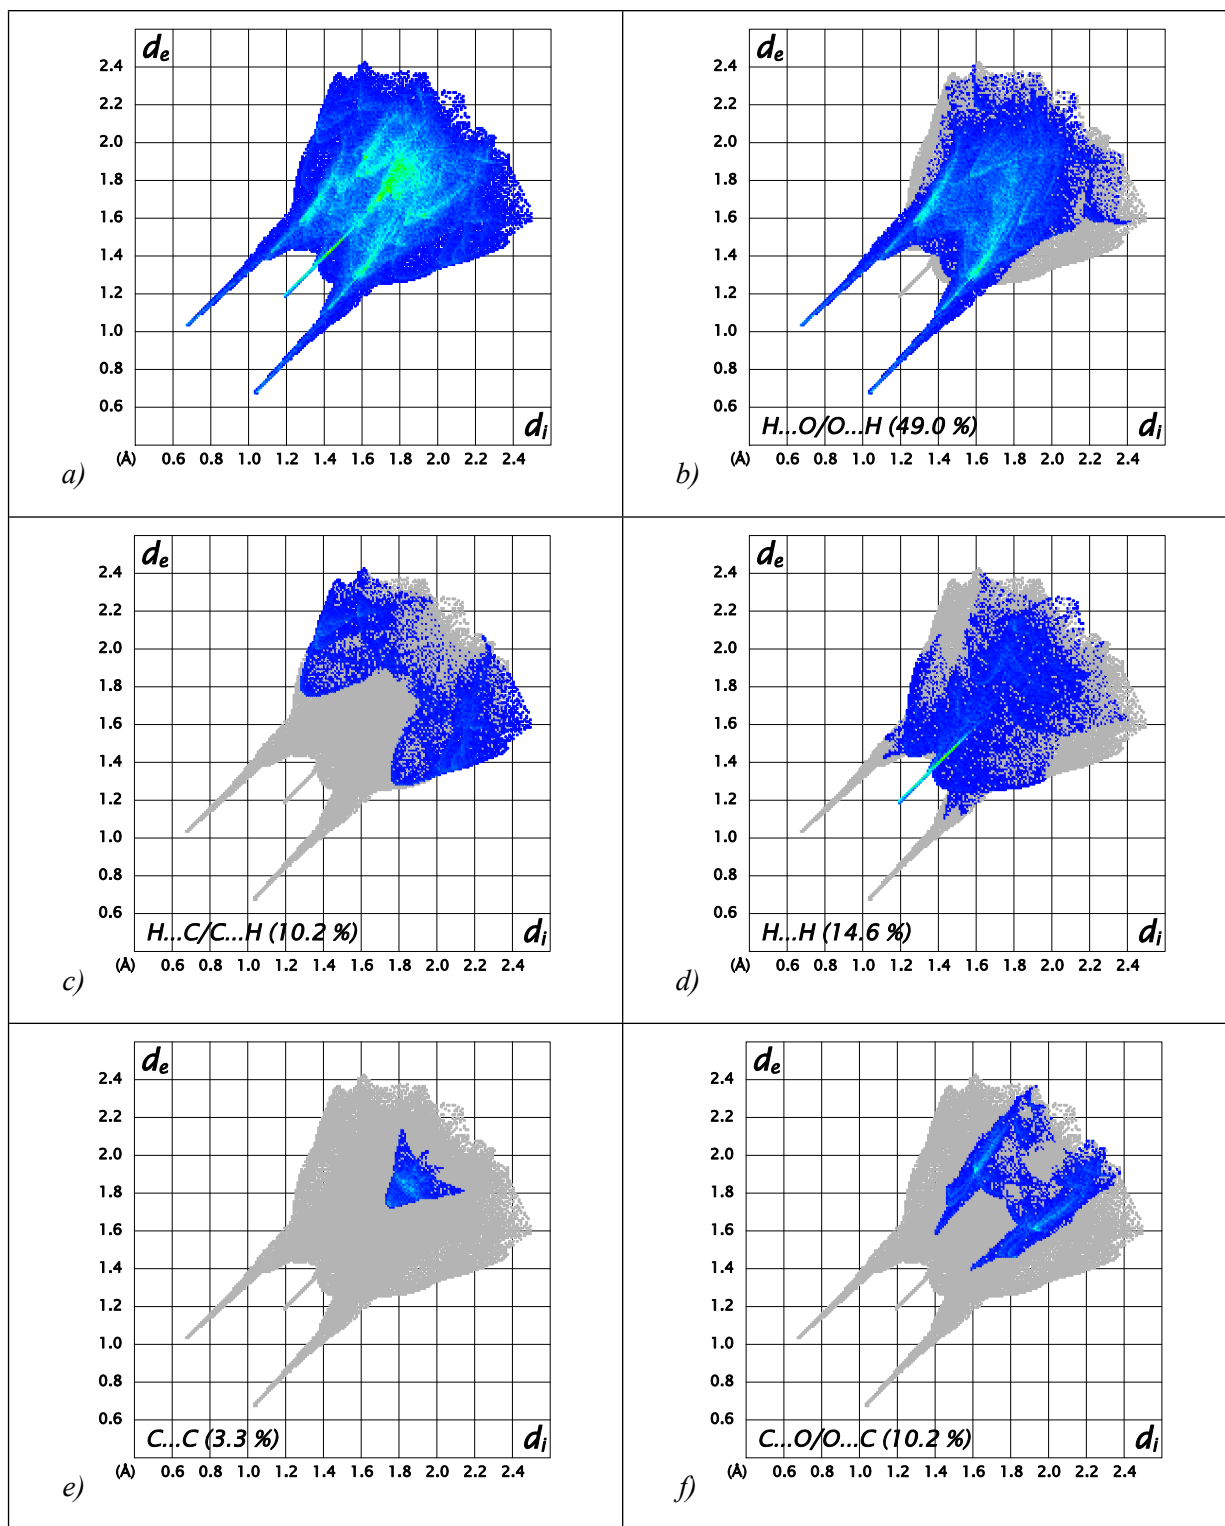

**Figure S9.** The full two-dimensional fingerprint plots of **1** (at 295K), showing (a) all interactions, and delineated into (b)  $H\cdots O/O\cdots H$ , (c)  $H\cdots C/C\cdots H$ , (d)  $H\cdots H$ , (e)  $C\cdots C$ , and (f)  $C\cdots O/O\cdots C$  interactions. The  $d_i$  and  $d_e$  values are the closest internal and external distances from given on the Hirshfeld surface contacts.

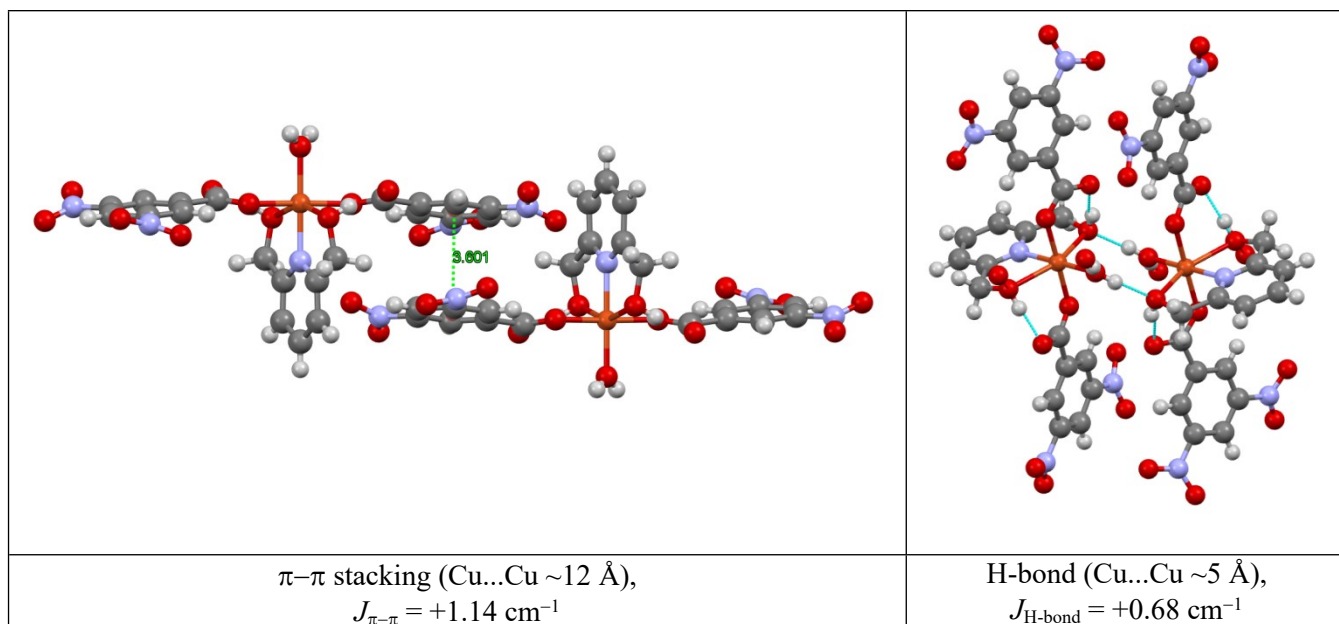

**Figure S10.** Model dimers for DFT calculations.

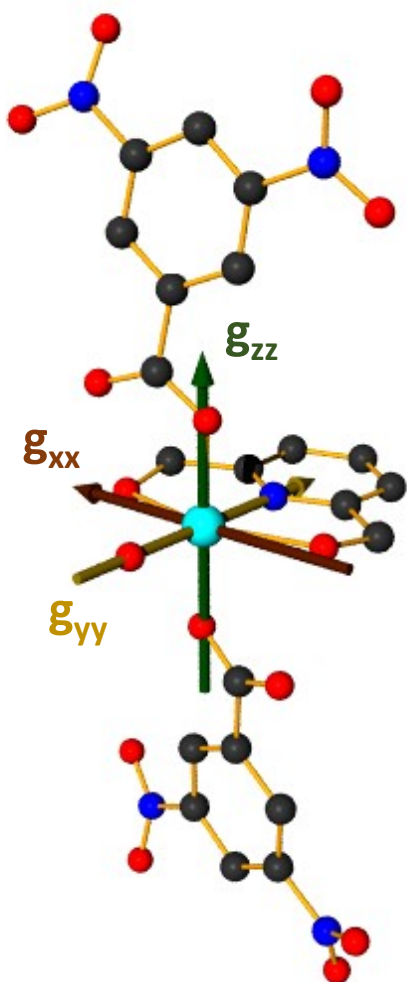

**Fig. S11.** Molecular structure of **1** along with the visualization of the calculated g-tensor components in the crystallographic molecular frame.



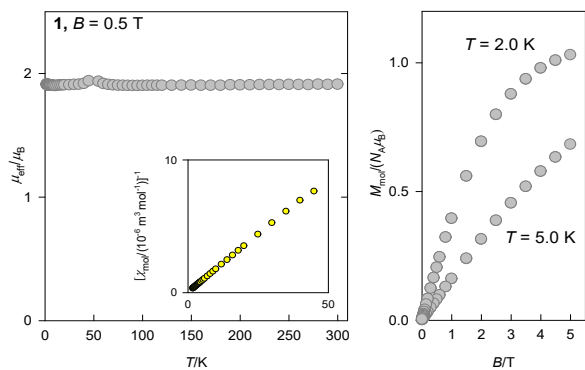

**Figure S12.** DC magnetic data.

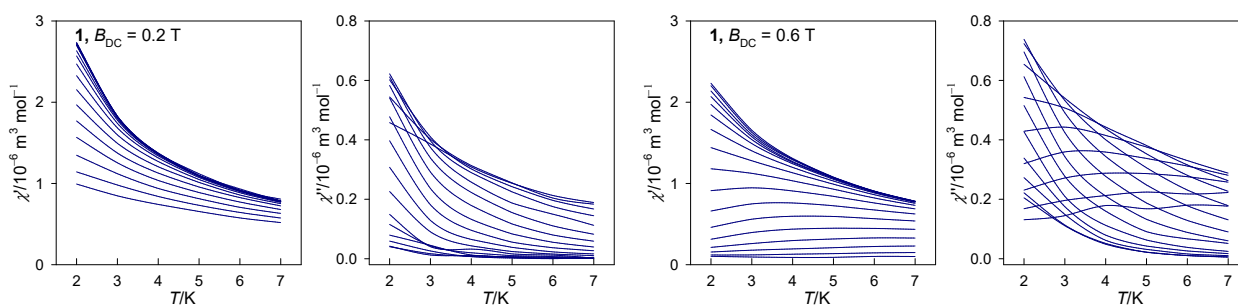

**Figure S13.** Temperature evolution of the AC susceptibility for **1**.

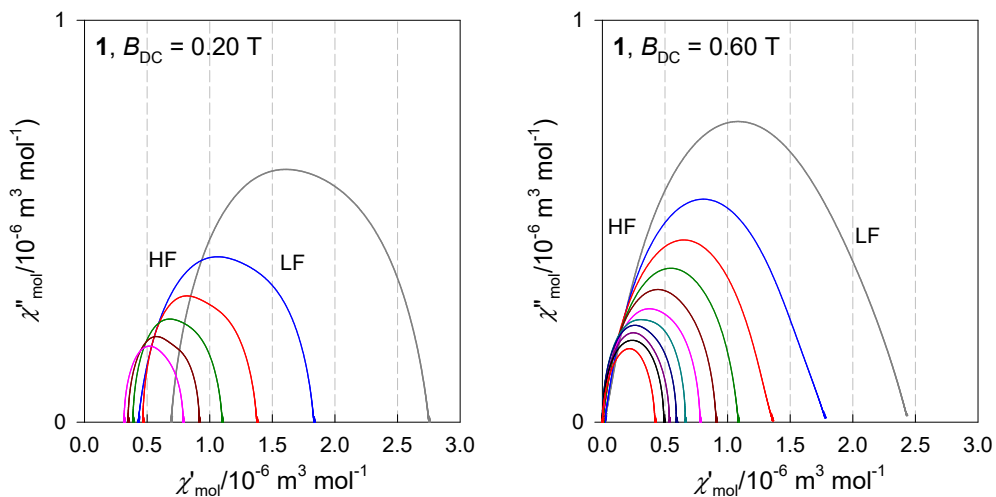

**Figure S14.** Cole-Cole plots for **1** showing an asymmetry due to merged two arcs.

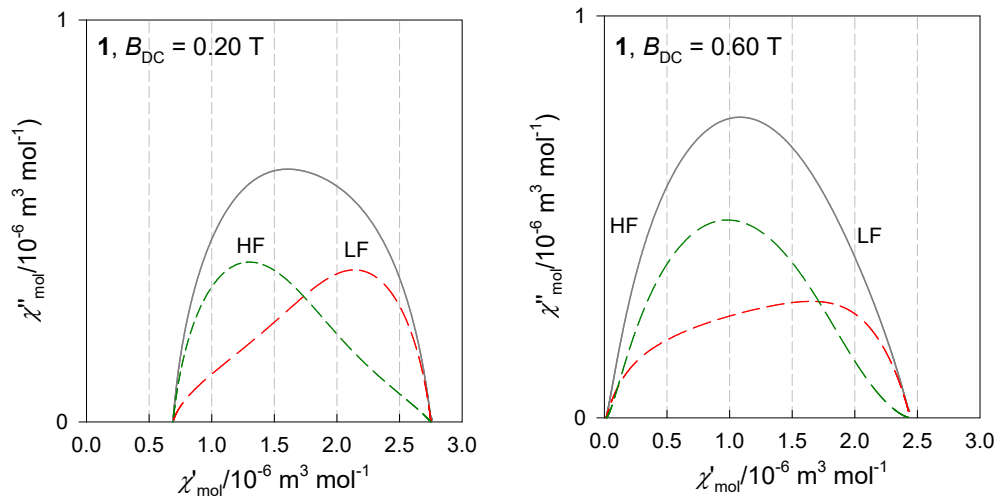

**Figure S15.** Decomposition of the Cole-Cole plots for **1** to two relaxation channels.
